# Supplementary material
Source: PubMed Central journal article supplement (PMC3050660)
Supplement: supp_dev.062158_DEV062158TableS5.pdf [file supp_dev.062158_DEV062158TableS5.pdf]

**Table S5. E17.5 control, *Fgfr1*<sup>UB-/-</sup>, *Fgfr2*<sup>LR/LR</sup> and *Fgfr1*<sup>UB-/-</sup>*Fgfr2*<sup>LR/LR</sup> kidney measurements**

| Genotype                | Control              | <i>Fgfr1</i> <sup>UB-/-</sup> | <i>Fgfr2</i> <sup>LR/LR</sup> | <i>Fgfr1</i> <sup>UB-/-</sup> <i>Fgfr2</i> <sup>LR/LR</sup> |
|-------------------------|----------------------|-------------------------------|-------------------------------|-------------------------------------------------------------|
| Length (mm)             | 0.25±0.018 (n=14)    | 0.26±0.017 (n=11)             | 0.25±0.017 (n=18)             | 0.24±0.013 (n=8)                                            |
| Area (cm <sup>2</sup> ) | 0.033± 0.0038 (n=14) | 0.035±0.0045 (n=11)           | 0.032±0.0034 (n=14)           | 0.033±0.0024 (n=8)                                          |
